# Supplementary material
Source: Research Square preprint supplement (doi:10.21203/rs.3.rs-9640813/v1)
Supplement: Supplementary file 1 [file 0cb97468e83cb0a4b3447ae9.docx]

**Supplementary File 1. Full-length original gel and blot images**

Manuscript: Novel compound-heterozygous variants in PYCR1 broaden the mutation spectrum of autosomal-recessive cutis laxa

**Notes for editorial assessment**

- For each gel/blot, the original available imaging frame is shown together with an annotated copy for clarity.

- For the Western blot experiments shown in Figure 4B, after transfer, the PVDF/NC membrane was physically cut to the required size according to the number of loaded lanes before antibody incubation and immunodetection. Therefore, no larger intact membrane image exists for these blots.

- The Western blot images provided here represent the complete membrane pieces/strips that were actually used for antibody incubation, immunodetection, and imaging, rather than digitally cropped portions from a larger blot image.

- In the annotated copies, the blue outline marks the physical edge of the complete gel image or membrane piece/strip used in the experiment. The red outline marks the cropped region used in the corresponding manuscript figure panel.

- The original images shown in the left panels are presented without annotations. The annotated copies are provided only to indicate the gel/membrane edge and the manuscript figure crop region.

- Images were resized only for document layout. No digital splicing, selective enhancement, or manipulation was applied to the original images shown in the left panels.

- Figure 3B: agarose gel electrophoresis of RT-PCR products. Lanes: M, Control, Patient. Band a and Band b are indicated in the manuscript figure.

- Figure 4B: Western blot analysis of Flag-PYCR1 expression. Lanes: wt = wild-type PYCR1; mut = c.724_725del mutant PYCR1. Anti-Flag was used to detect Flag-PYCR1 fusion protein. Beta-actin was used as the loading control. GFP was used as the transfection/vector expression control. Replicates 1, 2, and 3 correspond to the left, middle, and right Western blot panels shown in Figure 4B, respectively.

| **Manuscript panel** | **Original image included** | **Descriptor** | **Replicate information** |
| --- | --- | --- | --- |
| Figure 3B | Full-length agarose gel image | RT-PCR products; lanes M, Control, Patient; bands a and b | Original gel image used for Figure 3B |
| Figure 4B | Full-length anti-Flag blots | Flag-PYCR1 fusion protein | Replicates 1-3 shown as the three panels in Figure 4B |
| Figure 4B | Full-length beta-actin blots | Loading control | Replicates 1-3 shown as the three panels in Figure 4B |
| Figure 4B | Full-length GFP blots | Transfection/vector expression control | Replicates 1-3 shown as the three panels in Figure 4B |

**Figure 3B. Original full agarose gel image used for Figure 3B**

Original unprocessed full gel image and annotated copy. The red outline marks the cropped region used in Figure 3B. The blue outline marks the full gel image edge.

| **Original unprocessed full-length image** | **Annotated copy** |
| --- | --- |
| 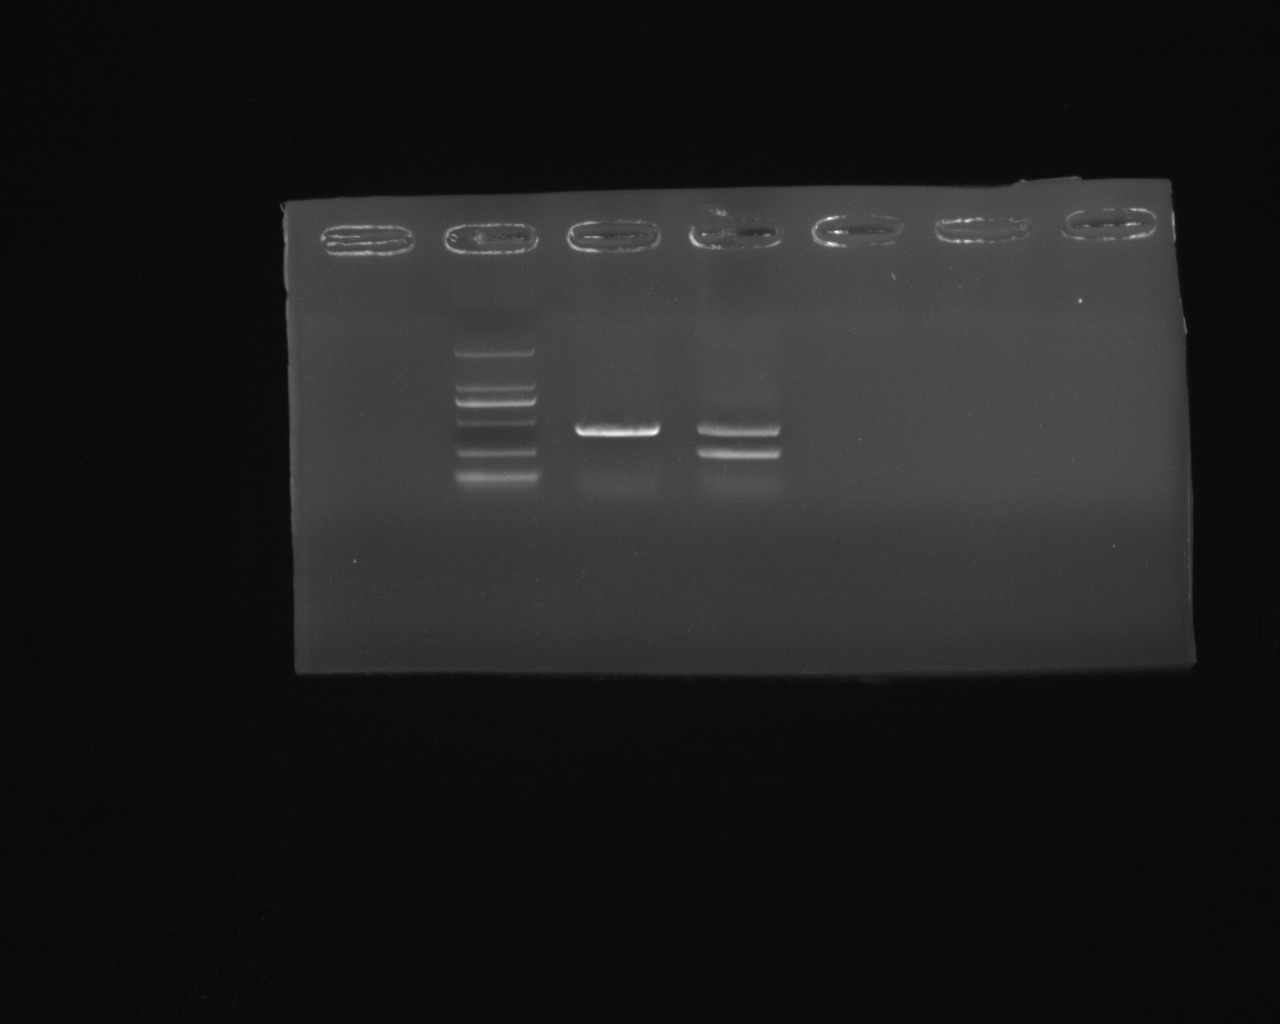 | 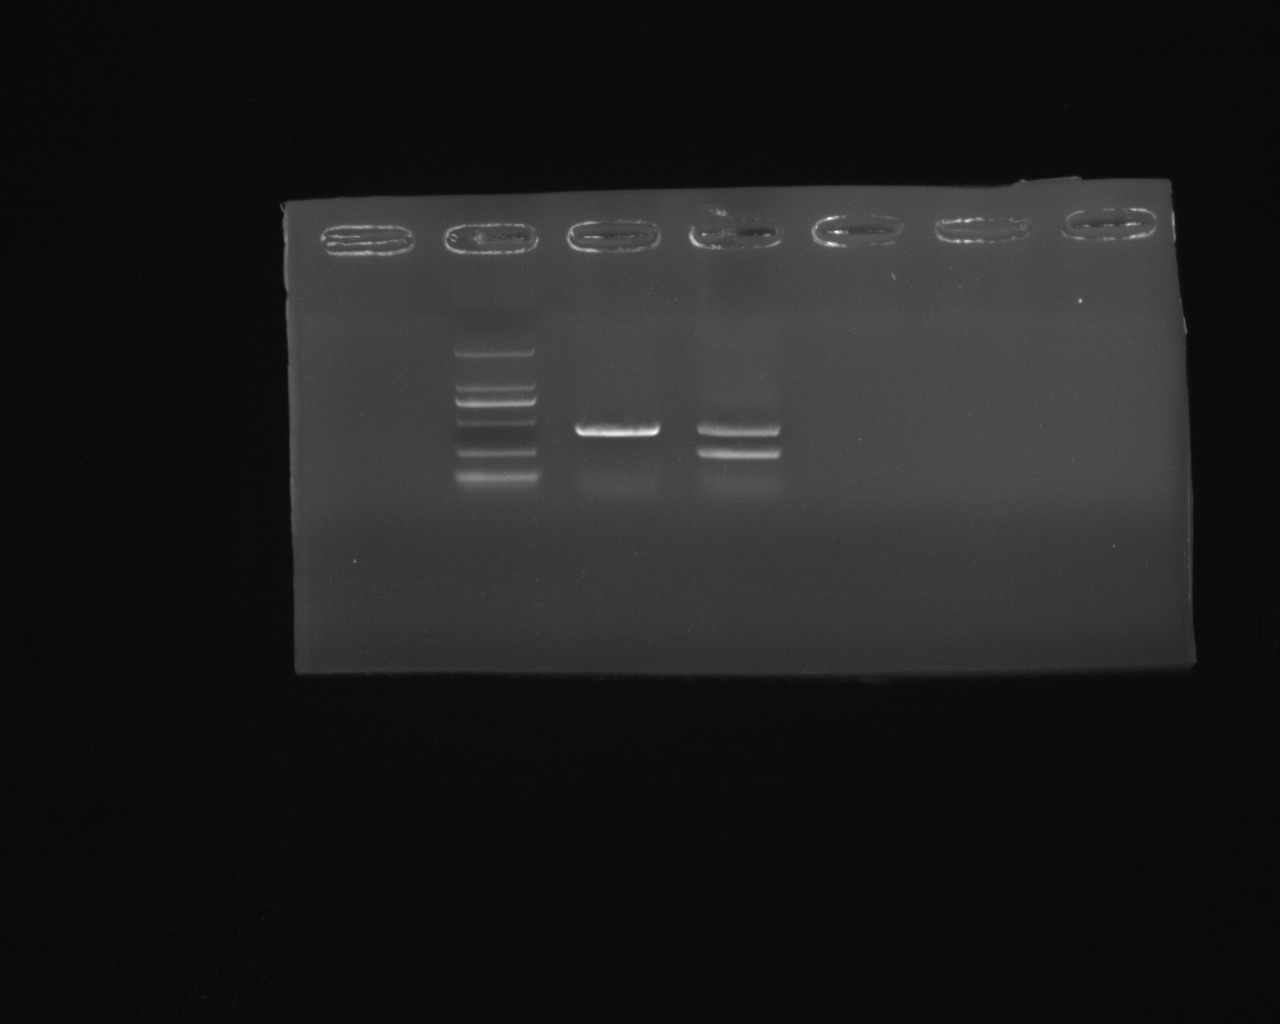  Control  M  Patient  Band b  Band a  Blue: physical edge of the complete membrane piece/strip used for this blot  Red: cropped region used in Fig. 3B  Corresponding figure: Figure 3B  Agarose gel electrophoresis of RT-PCR products  Lanes:M,ControlPatient  nding figure: Figure 3B  Agarose gel electrophoresis of RT-PcR products  Lanes: M, Control, Patient |

**Figure 4B. Original Western blot images of the complete membrane pieces/strips: anti-Flag / Flag-PYCR1**

anti-Flag detection of Flag-PYCR1 fusion protein. The red outline marks the cropped band region used in Figure 4B. Blue outlines mark the full blot/membrane edge. Replicates 1-3 correspond to the left, middle,and right Western blot panels in Figure 4B.

| **Replicate** | **Original unprocessed full-length image** | **Annotated copy** |
| --- | --- | --- |
| Replicate 1  (left panel in Figure 4B) | 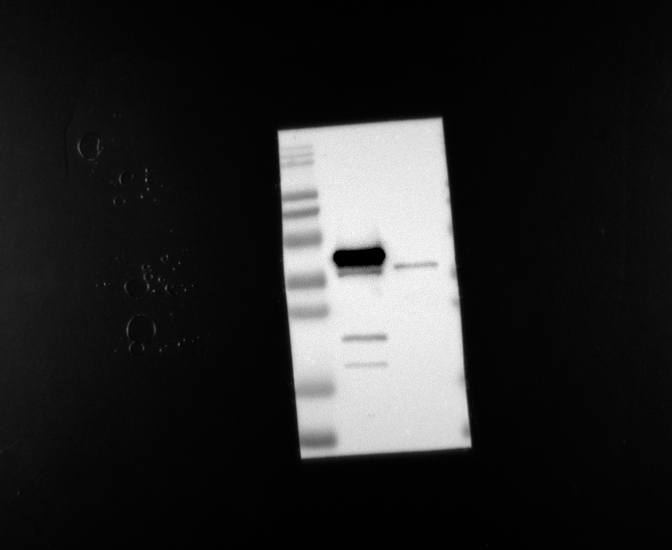 | 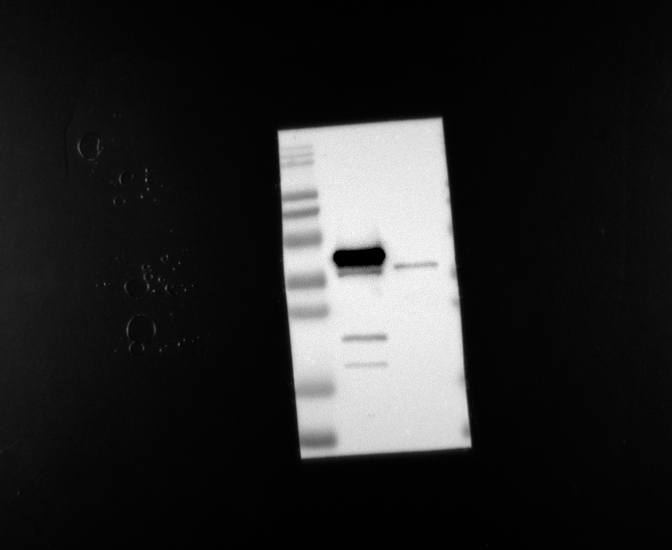  Blue: physical edge of the complete membrane piece/strip used for this blot  Red: cropped region used in Fig. 4B  Corresponding figure: Figure 4B  Replicate 1 (left panel in Figure 4B)  anti-Flag /Flag-PYCR1  Lanes: wt= wild type; mut = C.724_725del mutant  nding figure: Figure 3B  Agarose gel electrophoresis of RT-PcR products  Lanes: M, Control, Patient |
| Replicate 2  (middle panel in Figure 4B) | 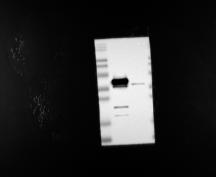 | 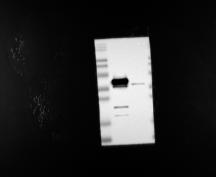  Blue: physical edge of the complete membrane piece/strip used for this blot  Red: cropped region used in Fig. 4B  Corresponding figure: Figure 4B  Replicate 2 (middle panel in Figure 4B)  anti-Flag /Flag-PYCR1  Lanes: wt= wild type; mut = C.724_725del mutant  nding figure: Figure 3B  Agarose gel electrophoresis of RT-PcR products  Lanes: M, Control, Patient |
| Replicate 3  (right panel in Figure 4B) | 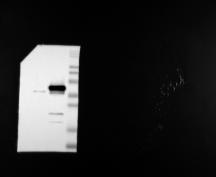 | 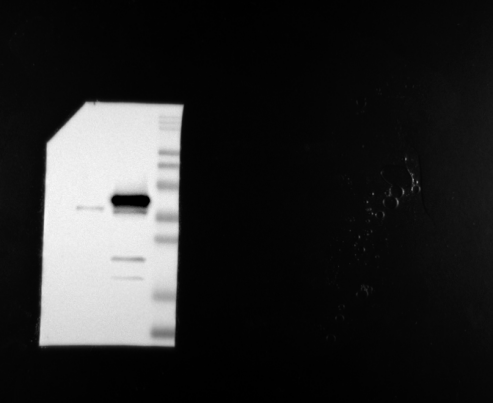  Blue: physical edge of the complete membrane piece/strip used for this blot  Red: cropped region used in Fig. 4B  Corresponding figure: Figure 4B  Replicate 3 (right panel in Figure 4B)  anti-Flag /Flag-PYCR1  Lanes: wt= wild type; mut = C.724_725del mutant  nding figure: Figure 3B  Agarose gel electrophoresis of RT-PcR products  Lanes: M, Control, Patient |

**Figure 4B. Original Western blot images of the complete membrane pieces/strips: beta-actin loading control**

beta-actin loading control. The red outline marks the cropped band region used in Figure 4B. Blue outlines mark the full blot/membrane edge. Replicates 1-3 correspond to the left, middle, and right Western blot panels in Figure 4B.

| **Replicate** | **Original unprocessed full-length image** | **Annotated copy** |
| --- | --- | --- |
| Replicate 1  (left panel in Figure 4B) | 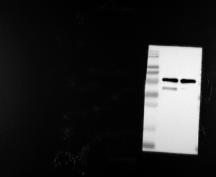 | 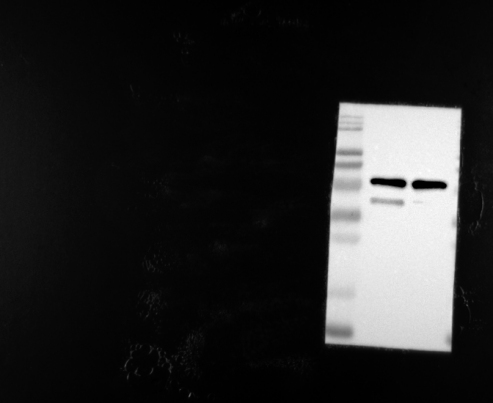  Red: cropped region used in Fig. 4B  Blue: physical edge of the complete membrane piece/strip used for this blot  Corresponding figure: Figure 4B  Replicate 1 (left panel in Figure 4B)  beta-actin loading control  Lanes: wt= wild type; mut = C.724_725del mutant  nding figure: Figure 3B  Agarose gel electrophoresis of RT-PcR products  Lanes: M, Control, Patient |
| Replicate 2  (middle panel in Figure 4B) | 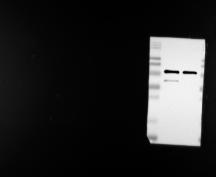 | 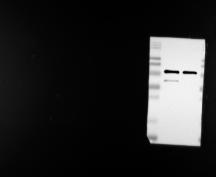  Red: cropped region used in Fig. 4B  Blue: physical edge of the complete membrane piece/strip used for this blot  Corresponding figure: Figure 4B  Replicate 2 (middle panel in Figure 4B)  beta-actin loading control  Lanes: wt= wild type; mut = C.724_725del mutant  nding figure: Figure 3B  Agarose gel electrophoresis of RT-PcR products  Lanes: M, Control, Patient |
| Replicate 3  (right panel in Figure 4B) | 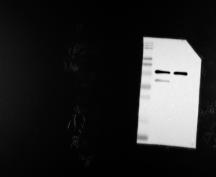 | 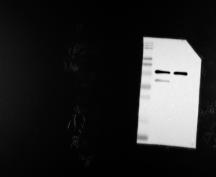  Blue: physical edge of the complete membrane piece/strip used for this blot  Red: cropped region used in Fig. 4B  Corresponding figure: Figure 4B  Replicate 3 (right panel in Figure 4B)  beta-actin loading control  Lanes: wt= wild type; mut = C.724_725del mutant  nding figure: Figure 3B  Agarose gel electrophoresis of RT-PcR products  Lanes: M, Control, Patient |

**Figure 4B. Original Western blot images of the complete membrane pieces/strips: GFP transfection/vector expression control**

GFP transfection/vector expression control. The red outline marks the cropped band region used in Figure 4B. Blue outlines mark the full blot/membrane edge. Replicates 1-3 correspond to the left, middle, and right Western blot panels in Figure 4B.

| **Replicate** | **Original unprocessed full-length image** | **Annotated copy** |
| --- | --- | --- |
| Replicate 1  (left panel in Figure 4B) | 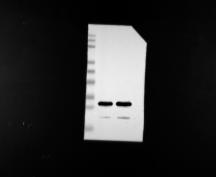 | 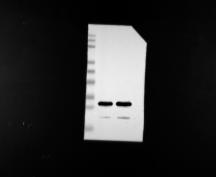  Blue: physical edge of the complete membrane piece/strip used for this blot  Red: cropped region used in Fig. 4B  Corresponding figure: Figure 4B  Replicate 1 (left panel in Figure 4B)  GFP transfection/vector expression control  Lanes: wt= wild type; mut = C.724_725del mutant  nding figure: Figure 3B  Agarose gel electrophoresis of RT-PcR products  Lanes: M, Control, Patient |
| Replicate 2  (middle panel in Figure 4B) | 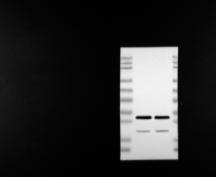 | 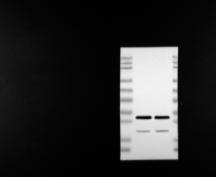  Blue: physical edge of the complete membrane piece/strip used for this blot  Red: cropped region used in Fig. 4B  Corresponding figure: Figure 4B  Replicate 2 (middle panel in Figure 4B)  GFP transfection/vector expression control  Lanes: wt= wild type; mut = C.724_725del mutant  nding figure: Figure 3B  Agarose gel electrophoresis of RT-PcR products  Lanes: M, Control, Patient |
| Replicate 3  (right panel in Figure 4B) | 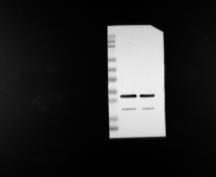 | 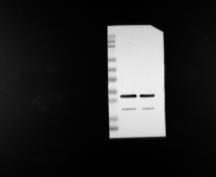  Blue: physical edge of the complete membrane piece/strip used for this blot  Red: cropped region used in Fig. 4B  Corresponding figure: Figure 4B  Replicate 3 (right panel in Figure 4B)  GFP transfection/vector expression control  Lanes: wt= wild type; mut = C.724_725del mutant  nding figure: Figure 3B  Agarose gel electrophoresis of RT-PcR products  Lanes: M, Control, Patient |
